# Supplementary material for: Ruthenium-catalyzed oxidation of alcohols by bromate in water
Source: Royal Society of Chemistry journal article supplement (doi:10.1039/c3nj00102d), 2013-01-01
Supplement: c3nj00102d.pdf [file c3nj00102d.pdf]

## Supporting Information Available

### Ruthenium-Catalyzed Oxidation of Alcohols by Bromate in Water

Zongmin Hu, Li Ma, Jianhui Xie, Hongxia Du, William W. Y. Lam and Tai-Chu Lau\*

*Department of Biology and Chemistry, City University of Hong Kong, Tat Chee Avenue, Kowloon Tong, Hong Kong, China. Institute of Molecular Functional Materials. State Key Laboratory in Marine Pollution (SKLMP).*

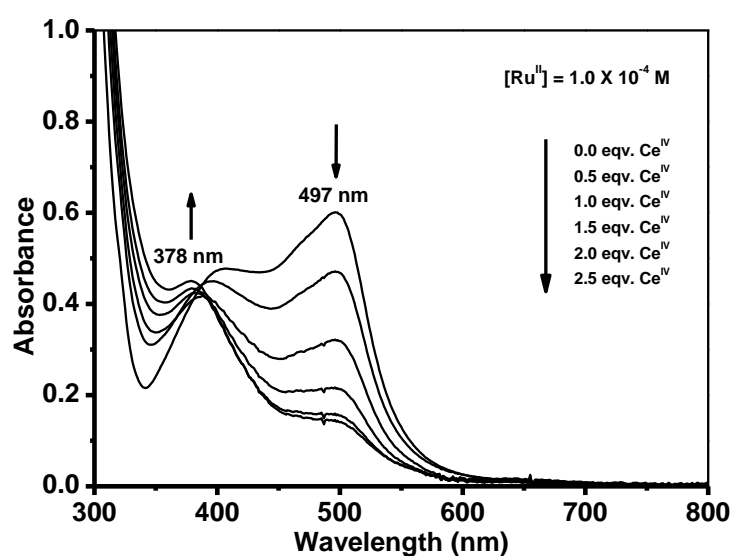

**Fig. S1** Spectrophotometric titration for  $\text{Ce}^{\text{IV}}$  and  $1.0 \times 10^{-4} \text{ M}$   $\text{Ru}^{\text{II}}$  in water at  $23^\circ\text{C}$ .

#### Materials

All organic substrates were obtained from Sigma-Aldrich and purified according to literature methods.<sup>1</sup> Sodium bromate was purchased from Acros Organic Chemicals and purified by recrystallization from water. *cis*- $[\text{Ru}(2,9\text{-Me}_2\text{phen})_2(\text{OH})_2](\text{PF}_6)_2$  was synthesized according to a published procedure.<sup>2,3</sup> Doubly distilled water was employed throughout the experiments.  $d^{12}$ -cyclohexanol (98+ atom % D) was purchased from Medical Isotopes and used as received.

#### Instrumentation

Ion chromatography was performed on a Dionex ICS-1600 liquid chromatograph equipped with a Dionex IonPac AS12A Analytical (4 × 200 mm) column. 2.7 mM Na<sub>2</sub>CO<sub>3</sub>/0.3 mM NaHCO<sub>3</sub> was used as eluent with a flow rate of 2.0 mL/min. Chromatography calibration standards were prepared in the 0.02–0.2 mM concentration range. Gas chromatographic analysis was performed on a HP5890 GC/FID instrument equipped with a DB-FFAP (30 m × 0.25 mm i.d.) or HP-5MS (30 m × 0.25 mm i.d.) column. GC/MS measurements were carried out on a HP6890 gas chromatograph interfaced to a HP 5975 mass selective detector. Electrospray ionization mass spectrometry (ESI/MS) was performed on a PE SCIEX API 365 mass spectrometer. The analyte solution was continuously infused with a syringe pump at a constant flow rate of 5 µL min<sup>-1</sup> into the pneumatically assisted electrospray probe with nitrogen as the nebulising gas. Kinetic experiments were done by using a Agilent 8453 diode-array spectrophotometer.

## References

1. *Purification and Laboratory Chemicals*, ed. D. D. Perrin and W. L. F. Armarego, Pergamon, New York, 3rd edn., 1988.
2. A. S. Goldstein, R. H. Beer and R. S. Drago, *J. Am. Chem. Soc.*, 1994, **116**, 2424.
3. J. P. Collin and J. P. Sauvage, *Inorg. Chem.*, 1986, **25**, 135.
